# Supplementary material
Source: PubMed Central journal article supplement (PMC10324473)
Supplement: NIHMS1904161-supplement-1.pdf [file NIHMS1904161-supplement-1.pdf]

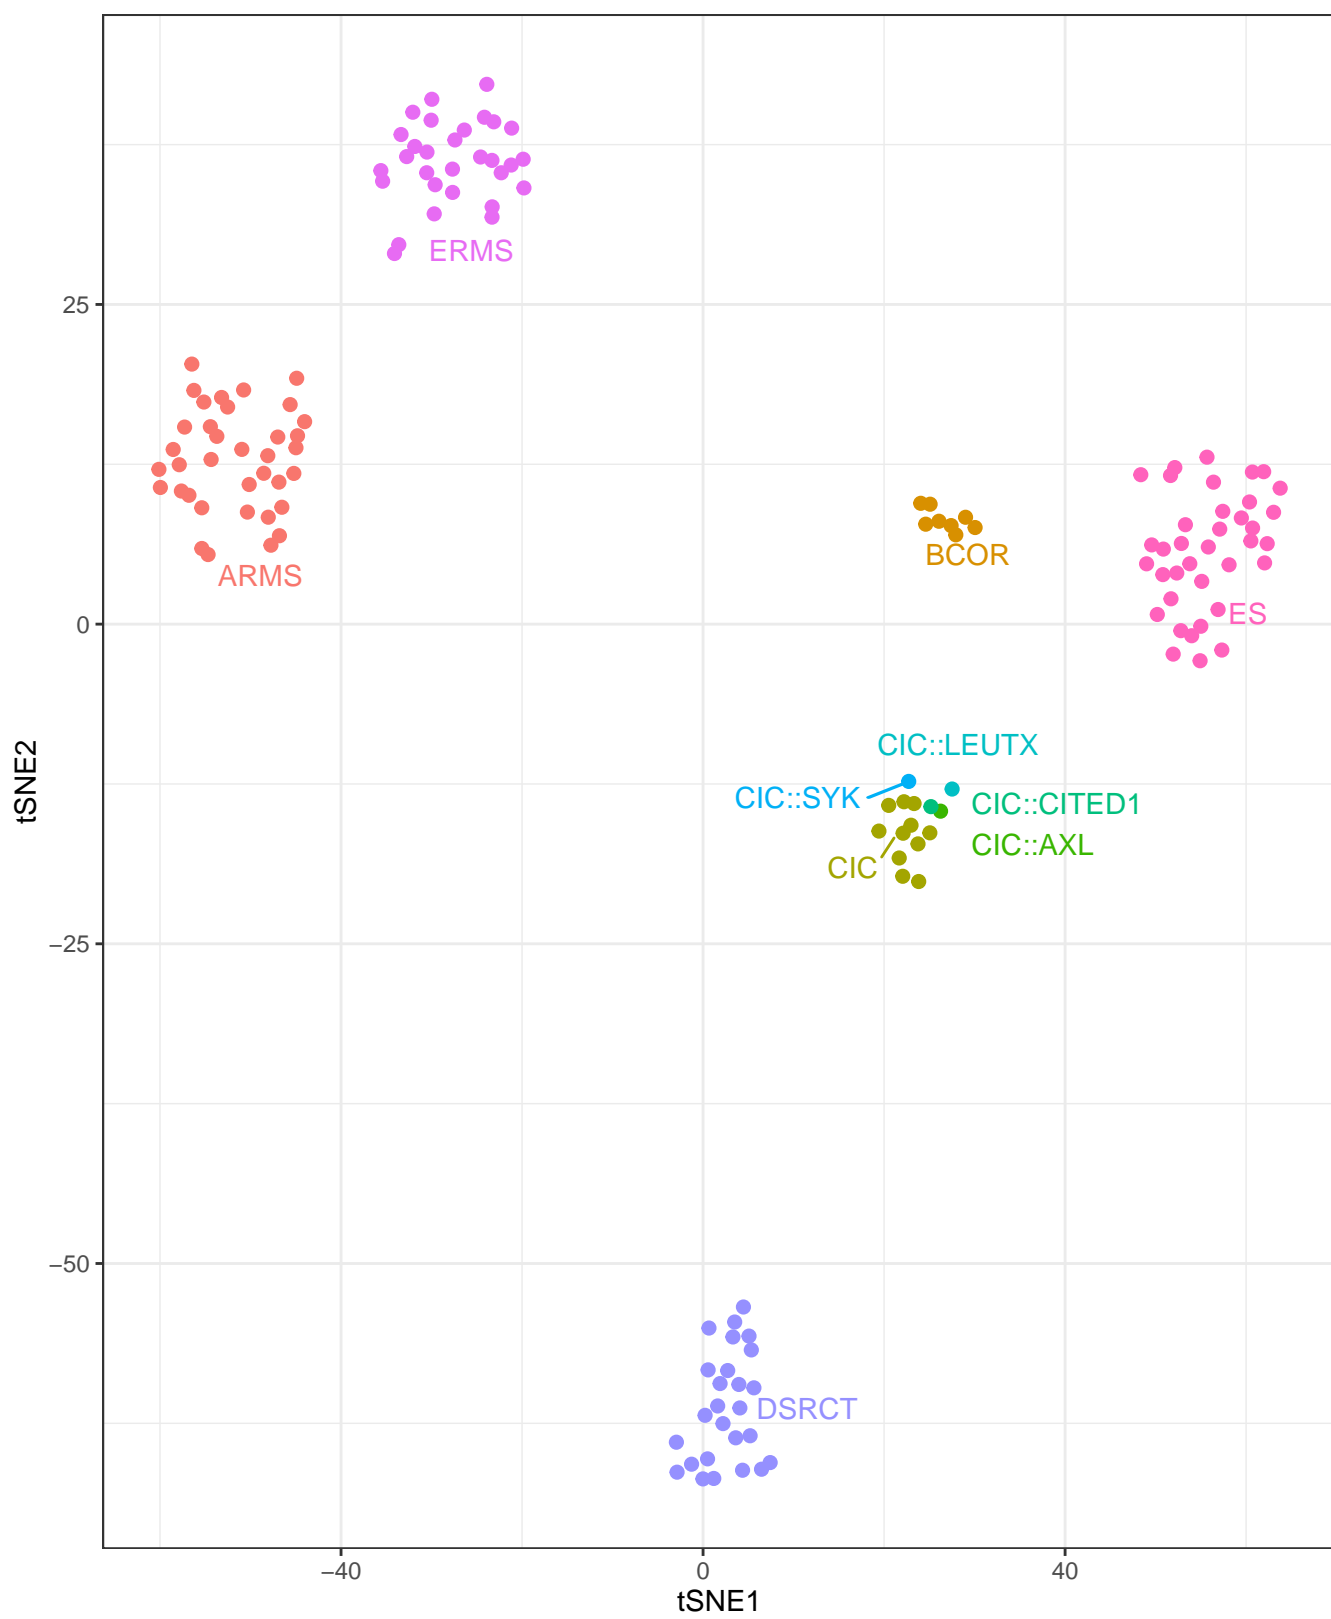

### Methylation Class

- Alveolar rhabdomyosarcoma (ARMS)
- Small blue round cell tumour with BCOR alteration (BCOR)
- Small blue round cell tumour with CIC alteration (CIC)
- CIC::AXL
- CIC::CITED1
- CIC::LEUTX
- CIC::SYK
- Desmoplastic small round cell tumour (DSRCT)
- Embryonal rhabdomyosarcoma (ERMS)
- Ewing sarcoma (ES)
